# Supplementary material for: Chitosan-based glycated polyampholyte nanogels for copper-catalysed Fenton-like reaction
Source: Royal Society of Chemistry journal article supplement (doi:10.1039/d4lp00055b), 2024-01-01
Supplement: d4lp00055b1.pdf [file d4lp00055b1.pdf]

## Supplementary Information

### Chitosan-Based Glycated Polyampholyte Nanogels for Copper-Catalysed Fenton-Like Reaction

Yeonjoo Jung, Eunseo Lee, So-Lee Baek, and Sang-Min Lee\*

Department of Chemistry, The Catholic University of Korea, Bucheon, Gyeonggi-do 14662, Korea.

\*E-mail: smlee120@catholic.ac.kr

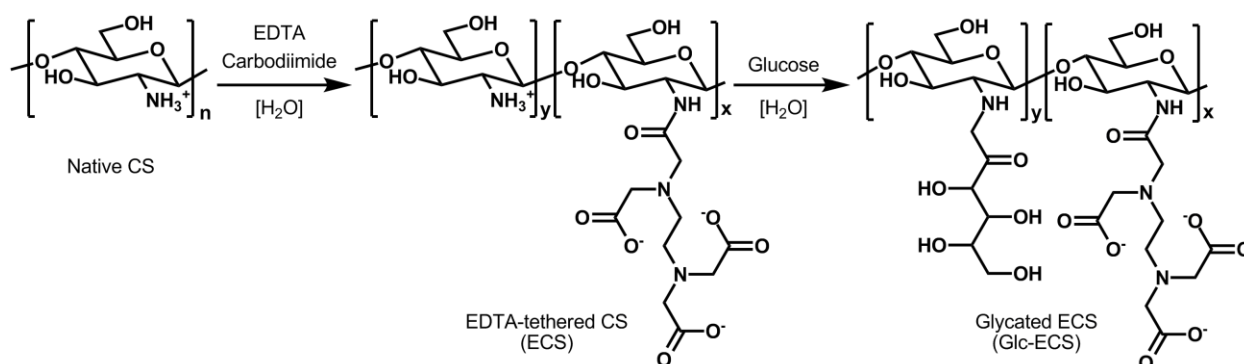

**Scheme S1** Synthetic scheme of Glc-ECS by chemical modification of native CS ( $n = \sim 430$ ,  $x = 0.2-0.5$ ).

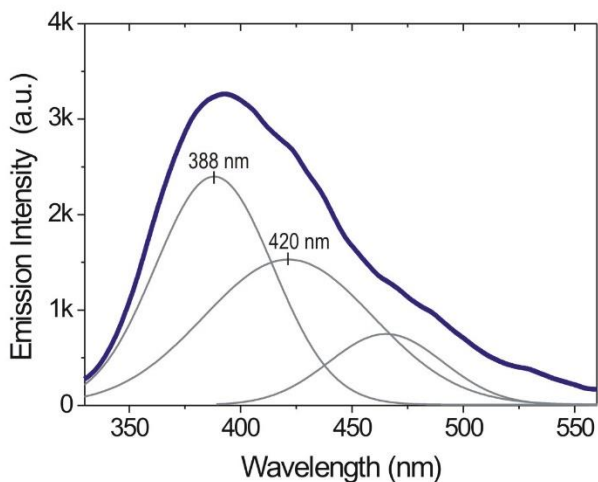

**Fig. S1** Fluorescence emission spectrum of Glc-ECS ( $\lambda_{ex} = 340$  nm) (blue) and the corresponding spectra obtained by deconvolution (black).

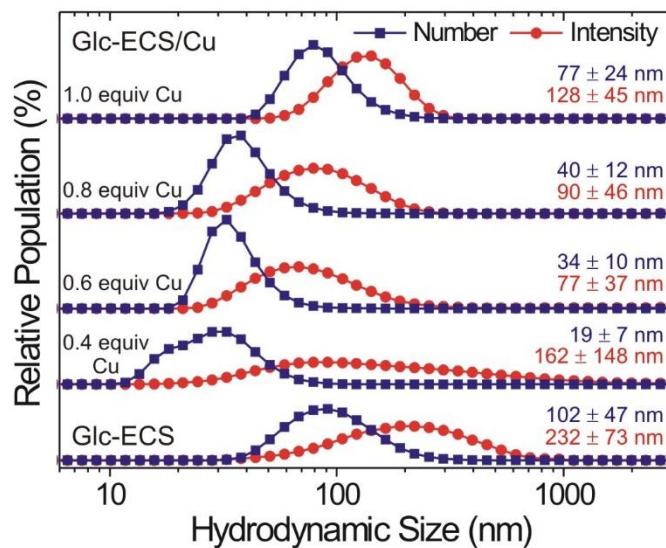

**Fig. S2** DLS distribution of Glc-ECS/Cu nanogels depending on the loading amount of Cu(II) ion. Before addition of Cu(II), soluble Glc-ECS can have a random coil conformation, showing relatively large sizes with a broader size distribution, while Cu-chelation can transform the polymer into a condensed globular structure, leading to a significant reduction in diameter.<sup>S1</sup>

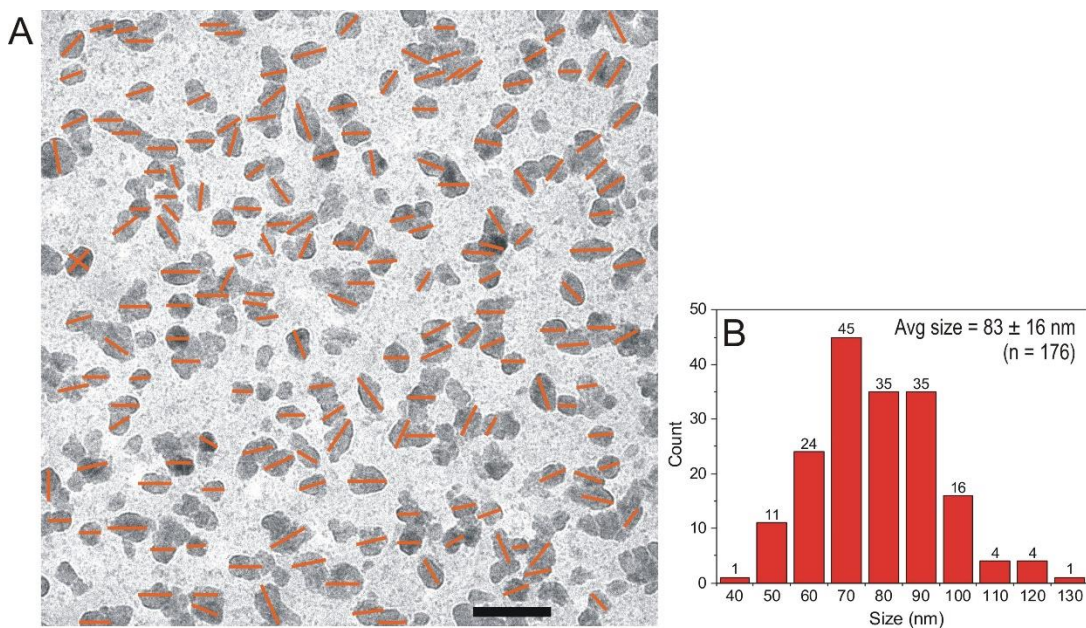

**Fig. S3** Statistical particle size estimate of Glc-ECS/Cu nanogels. (A) Large area TEM image (scale bar = 200 nm) and (B) the corresponding size distribution of Glc-ECS/Cu nanogels.

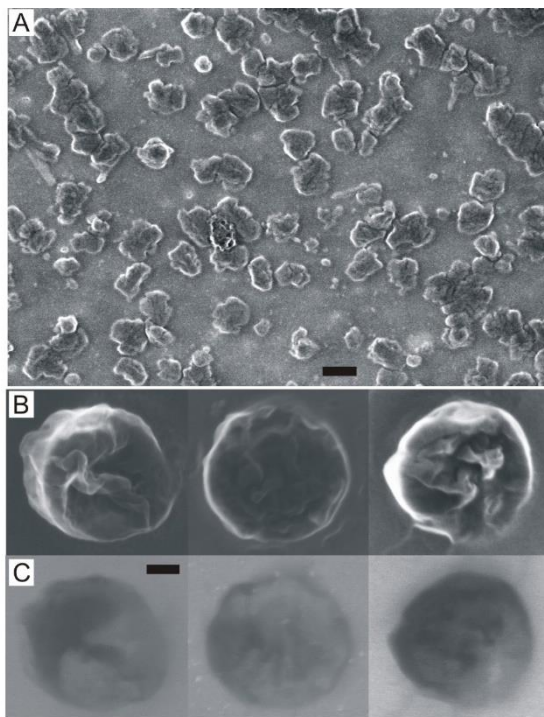

**Fig. S4** (A) Large area scanning electron microscope (SEM) image of Glc-ECS/Cu nanogels (Scale bar: 100 nm). (B, C) High resolution SEM images of individual Glc-ECS/Cu nanogel particle in (B) SEM mode and (C) the corresponding bright-field STEM mode, which provide the information on the internal structures (Scale bar: 20 nm). In STEM mode, dense regions with heavy elements appear brighter, while a darker contrast shows less dense regions with light elements.

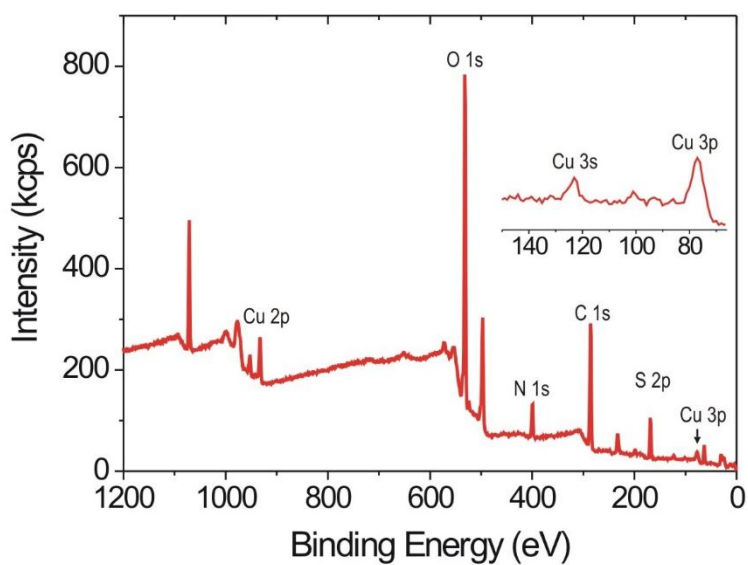

**Fig. S5** XPS survey spectrum of Glc-ECS/Cu nanogels.<sup>S2</sup>

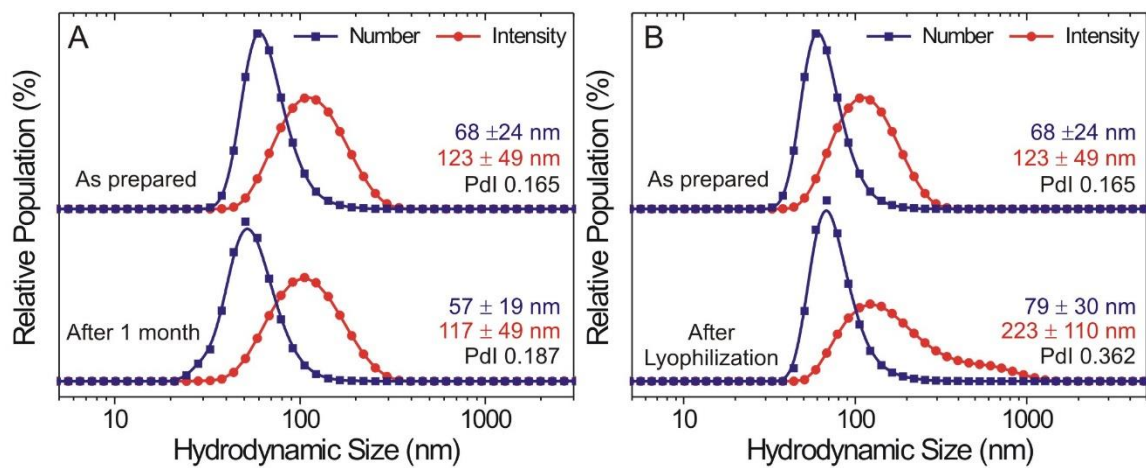

**Fig. S6** Colloidal stability observation of Glc-ECS/Cu nanogels by comparing the DLS distribution (A) after 1-month agitation at room temperature and (B) after lyophilization and rehydration.

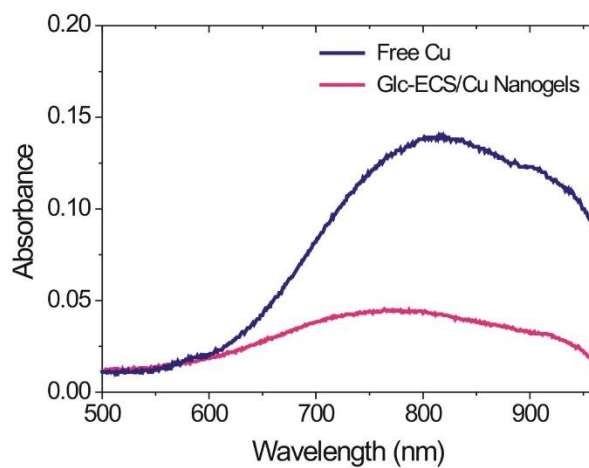

**Fig. S7** Estimation of Cu leakage after Glc-ECS/Cu nanogel formation through centrifugal filtration. Compared to the free Cu, less than 30% Cu leakage was observed from the nanogels.

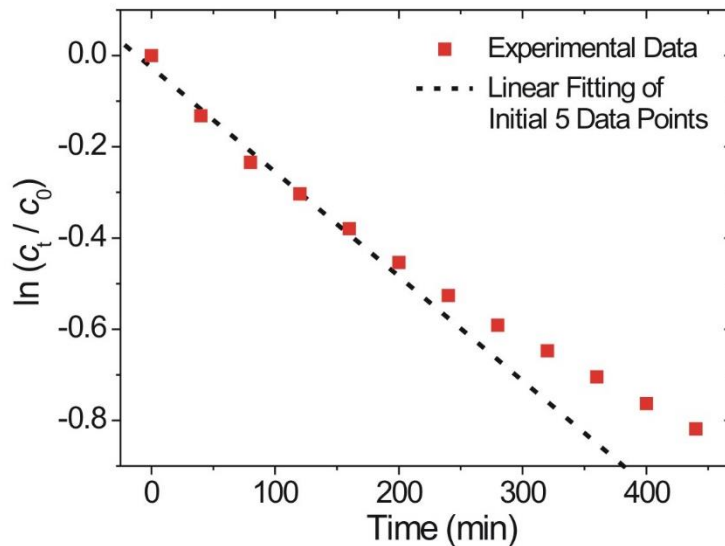

**Fig. S8** First-order fit of reaction kinetics monitored with Glc-ECS/Cu under the condition of  $[\text{Cu}^{2+}] = 0.6$  mM,  $[\text{MB}] = 40$   $\mu\text{M}$ , and  $[\text{H}_2\text{O}_2] = 80$  mM at  $25$   $^\circ\text{C}$ , showing significant deviation from linearity.

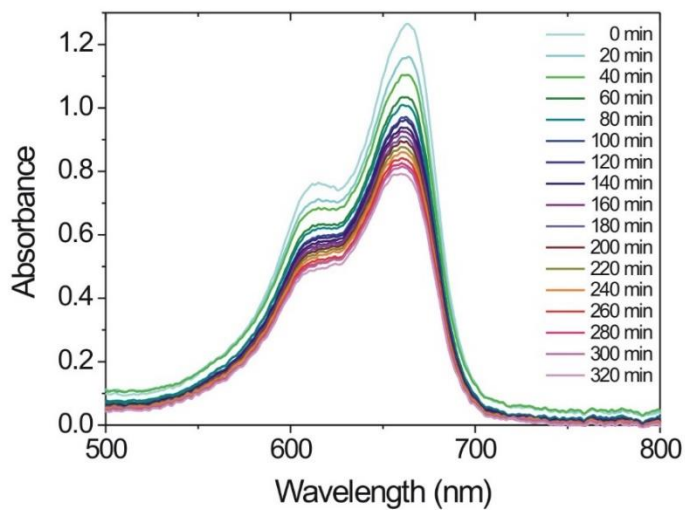

**Fig. S9** Time-dependent change of UV-vis absorption spectra of MB by Glc-ECS/Cu-catalysed reaction under the condition of  $[\text{Cu}^{2+}] = 0.6$  mM,  $[\text{MB}] = 40$   $\mu\text{M}$ , and  $[\text{H}_2\text{O}_2] = 10$  mM at pH 7.0 and  $25$   $^\circ\text{C}$ .<sup>S3</sup>

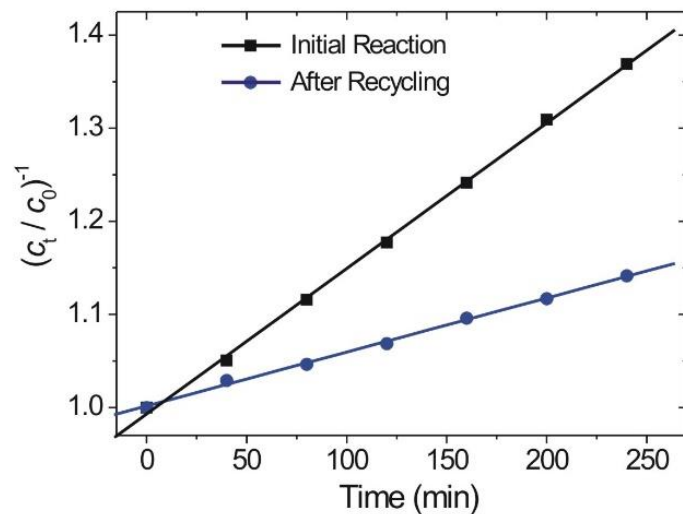

**Fig. S10** Comparison of Fenton-like reaction kinetics after the recycling of Glc-ECS/Cu catalyst through centrifugal filtration.

#### References.

- S1. Y. H. Jeong, T. Ahn, W. Yu and S. M. Lee, *ACS Macro Lett.*, 2021, **10**, 492-497.
- S2. A. C. Miller and G. W. Simmons, *Surf. Sci. Spectra*, 1993, **2**, 55-60.
- S3. Z. E. Hu, J. Li, Z. N. Wu, Y. J. Wei, Y. H. Liu, N. Wang and X. Q. Yu, *ACS Biomater. Sci. Eng.*, 2021, **7**, 1394-1402.
